# Supplementary material
Source: publisher figshare collection journal article supplement (https://acs.figshare.com/ndownloader/files/4261204)
Supplement: Supplementary file 1 [file 4261204]

# Short-Term Memory to Long-Term Memory Transition in a Nanoscale Memristor

## Supporting Information

Authors

Ting Chang, Sung-Hyun Jo, and Wei Lu\*

Department of Electrical Engineering and Computer Science, University of Michigan, MI,  
48109, USA

\*Corresponding author. Electronic mail: [wluee@eecs.umich.edu](mailto:wluee@eecs.umich.edu)

### The Weibull Distribution

The two-parameter probability density function (*pdf*) of a Weibull distribution is<sup>1</sup>

$$f(x, \lambda, k) = \begin{cases} \frac{k}{x} \left(\frac{x}{\lambda}\right)^{k-1} e^{-(x/\lambda)^k} & x \geq 0, \\ 0 & x < 0, \end{cases} \quad (S1)$$

, where  $k > 0$  is the shape parameter and  $\lambda > 0$  is the scale parameter. The corresponding cumulative density function (*cdf*) is

$$F(x; k, \lambda) = 1 - e^{-(x/\lambda)^k} \quad (S2)$$

for  $x \geq 0$ , or else  $F(x; k, \lambda) = 0$ .

From eq S1 and S2, the survival function (*i.e.* the complementary *cdf* of Weibull) is

$$S(x) = e^{-(x/\lambda)^k} \quad (S3)$$

, which has the form of a stretched-exponential function.

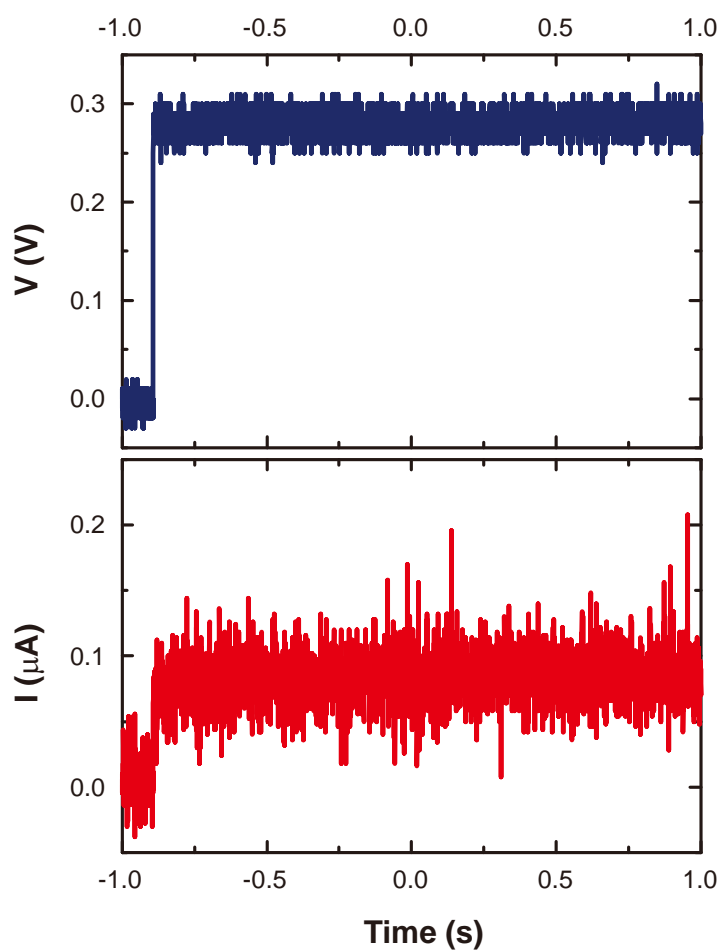

**Figure S1.** Effects of the read voltage on the memristor. The top panel shows the application of a constant read voltage of 0.3 V used in the studies and the bottom panel shows the corresponding current. The current stays at a stable level within the measured timeframe, proving that a small read voltage of 0.3V has negligible effect on the memristor device.

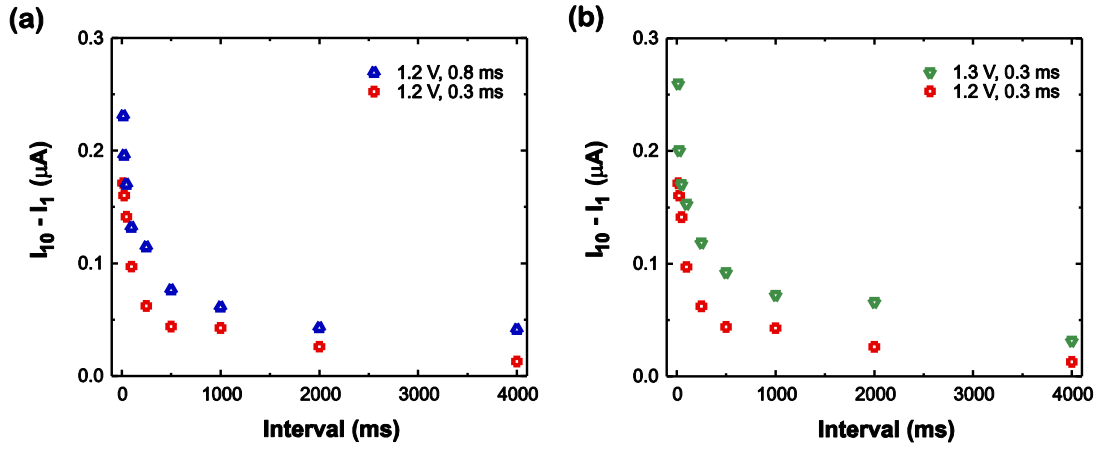

**Figure S2.** Effects of the pulse duration and pulse amplitude on STM-LTM transition. The stimulation pulse interval was fixed at 60 ms.  $I_{10} - I_1$  was measured against stimulation rates for (a) different pulse durations and (b) different pulse amplitudes. Longer pulse duration and larger pulse amplitude both lead to larger  $I_{10} - I_1$ , and hence are more effective in the memory transitions.

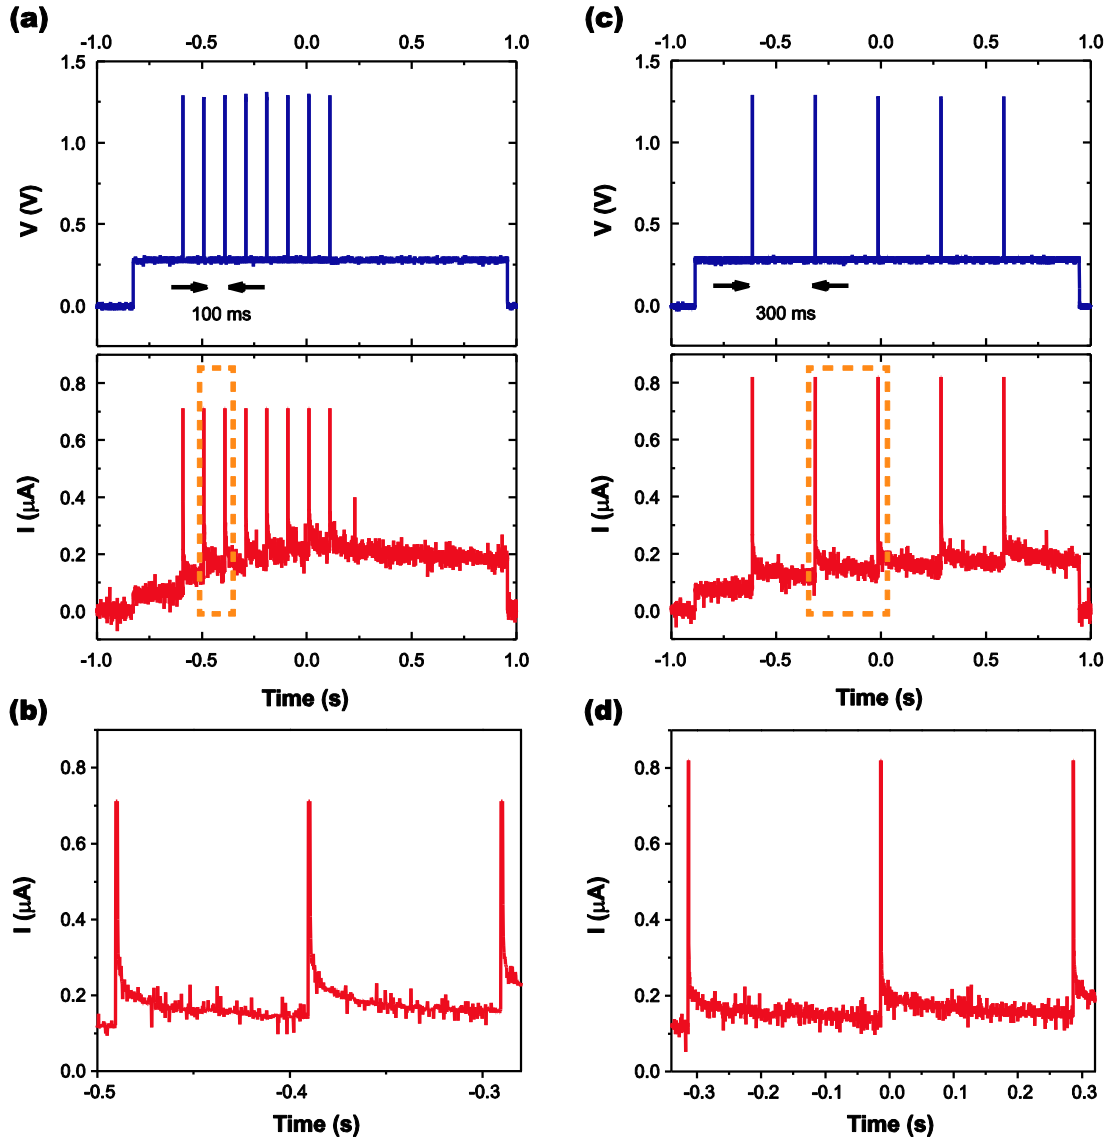

**Figure S3.** Effects of the pulse interval on STM-LTM transition. Same methods used as in Figure 2b, except the interval was changed to (a) 100 ms and (c) 300 ms. (b) and (d) are zoomed-in views of the rectangular areas in (a) and (c), respectively. Stimulations with shorter pulse interval (*i.e.* higher stimulation rate) are clearly more effectively in causing the memory transitions, in agreement with the observation in Figure 4.

## References

1. Schroder, D. K. *Semiconductor Material and Device Characterization*, 3rd ed.; IEEE Press: New Jersey, 2006.
